# Supplementary material for: Surface Functionalization of Face Masks with Cold Plasma and Its Effect in Anchoring Polyphenols Extracted from Agri-Food
Source: MDPI journal article supplement (doi:10.3390/molecules27238632), 2022-12-06
Supplement: s1 [file s1]

# Surface functionalization of face masks with cold plasma and its effect in anchoring polyphenols extracted from agri-food

Francesca Cicogna<sup>1</sup>, Emilia Bramanti<sup>1</sup>, Beatrice Campanella<sup>1</sup>, Stefano Caporali<sup>2</sup>, Luca Panariello<sup>3</sup>, Caterina Cristallini<sup>4</sup>, Randa Ishak<sup>3</sup>, Niccoletta Barbani<sup>3</sup>, Elisa Passaglia<sup>1\*</sup>, Serena Coiai<sup>1</sup>

<sup>1</sup> National Research Council-Institute of Chemistry of OrganoMetallic Compounds (CNR-ICCOM), SS Pisa, Via Moruzzi 1, 56124 Pisa, Italy

<sup>2</sup> Department of Industrial Engineering, DIEF, University of Florence, Via S. Marta 3, 50139 Firenze, Italy

<sup>3</sup> Department of Civil and Industrial Engineering, University of Pisa, Largo L. Lazzarino 1, 56122, Pisa, Italy

<sup>4</sup> National Research Council-Institute for Physical and Chemical Processes (CNR-IPCF), SS Pisa, Largo L. Lazzarino 1, 56122 Pisa, Italy

\* Correspondence: elisa.passaglia@pi.iccom.cnr.it

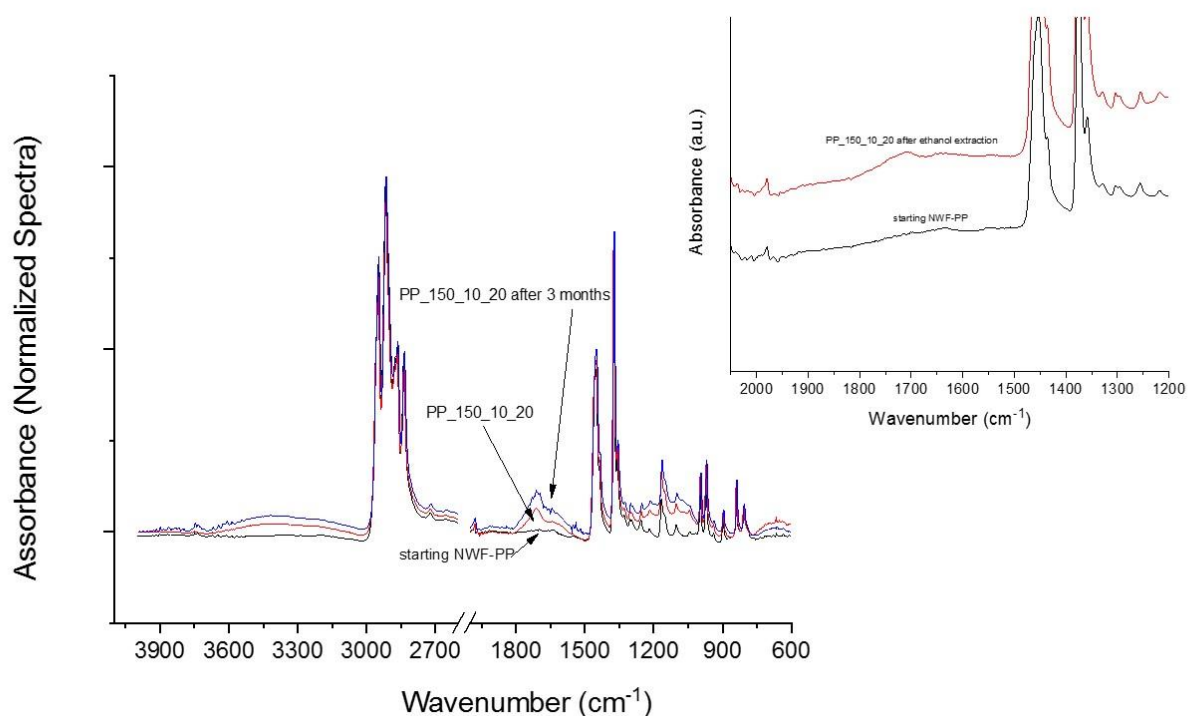

Figure S1. Normalized FTIR-ATR spectra of NWF-PP, PP<sub>150\_10\_20</sub> sample and PP<sub>150\_10\_20</sub> sample after 3 months. Inset: normalized FTIR-ATR spectra of NWF-PP and PP<sub>150\_10\_20</sub> sample after ethanol washing.

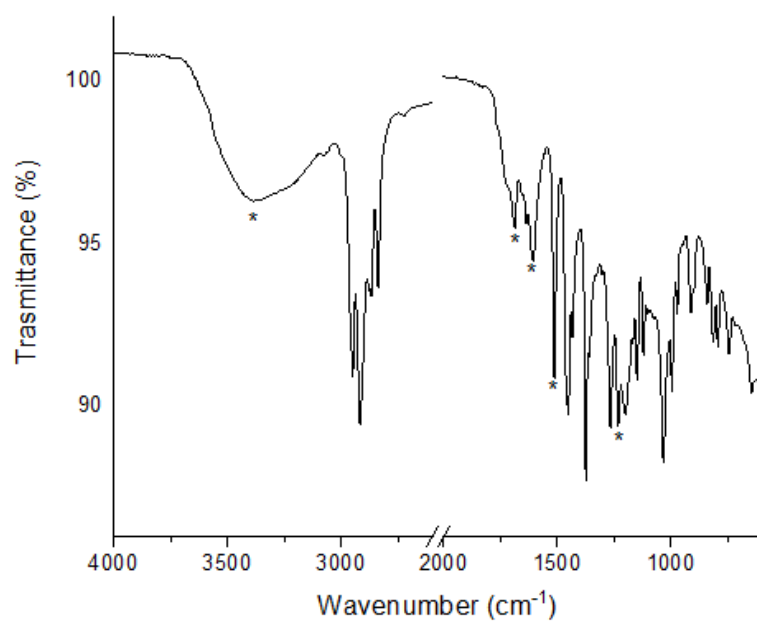

Figure S2: FTIR-ATR spectrum of sample PP\_150\_10\_20 after dipping in the cloves extract; stars highlighted the main absorption bands of polyphenols

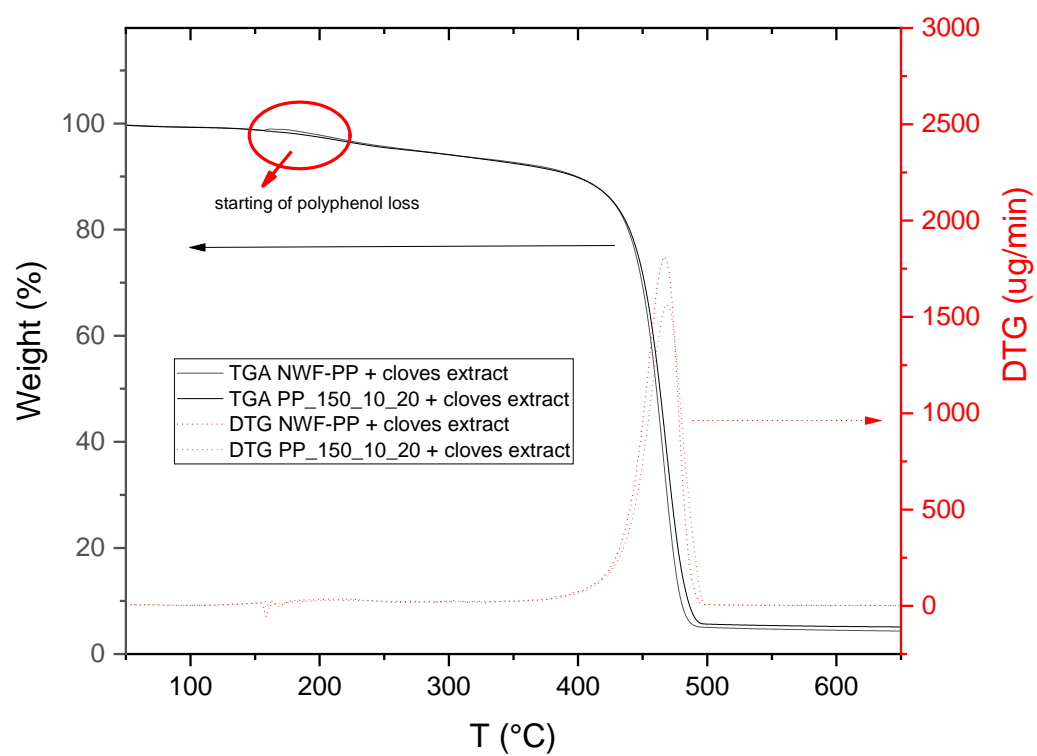

Figure S3: TGA and DTG curves of samples blank (NWF-PP) and PP\_150\_10\_20 treated with cloves extract

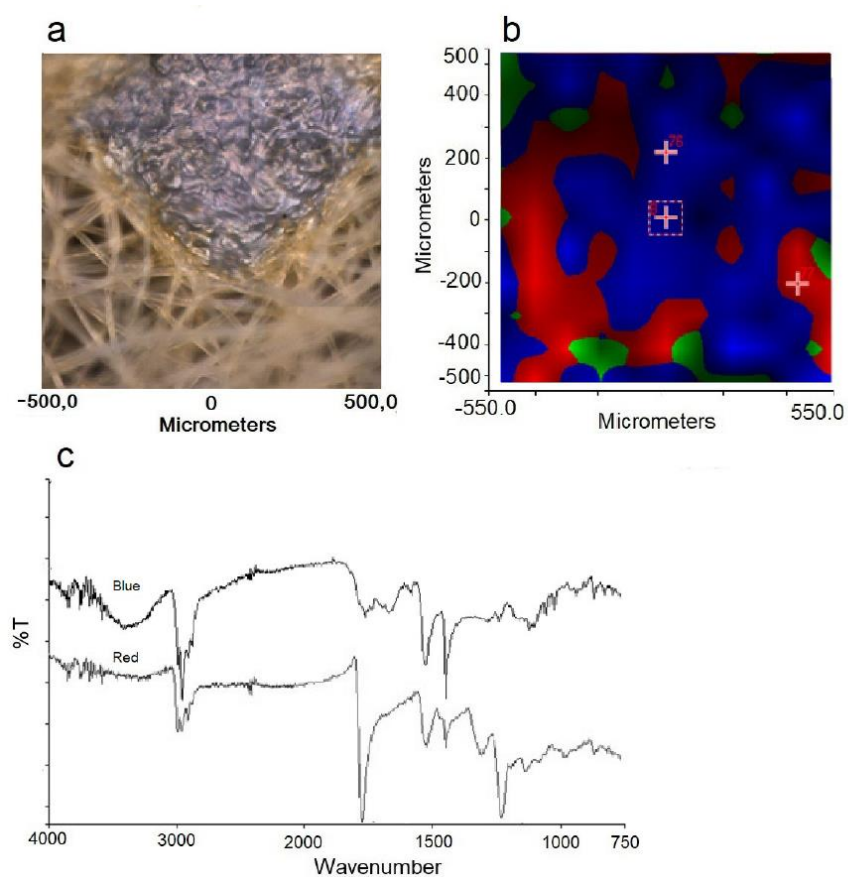

Figure S4. (a) Optical image of analysed portion of sample PP\_150\_10\_20 treated with clove buds extract and its mapping (b); (c) FTIR spectra collected in the green, red and blue zones evidenced in the mapped imaging (b).

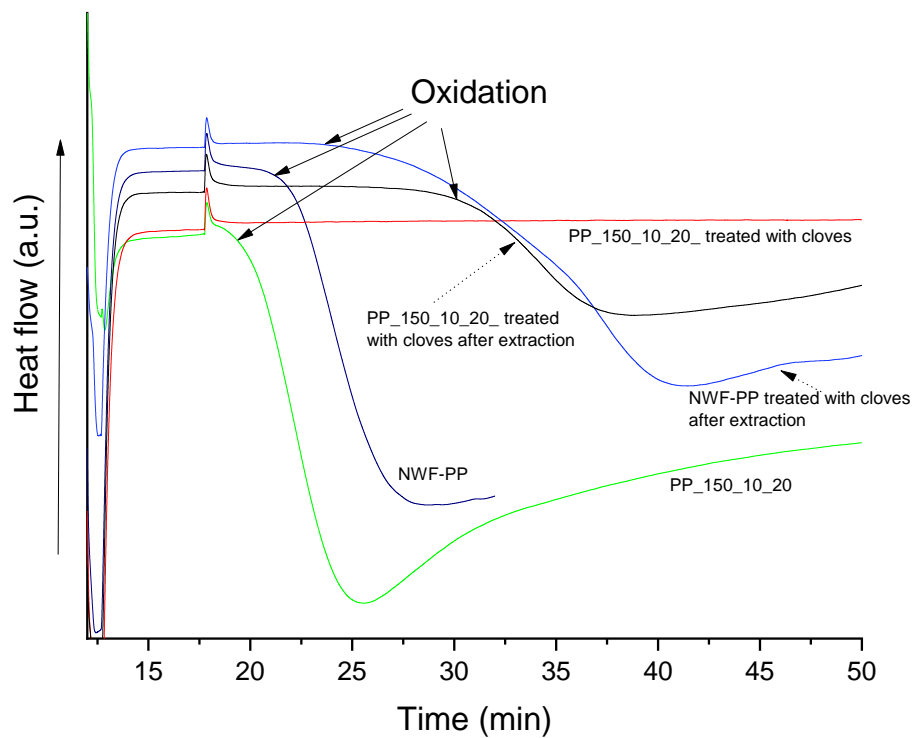

Figure S5. OIT curves of pristine NWF-PP, PP\_150\_10\_20, PP\_150\_10\_20\_cloves, NWF-PP treated with cloves and PP\_150\_10\_20 treated with cloves after extraction.

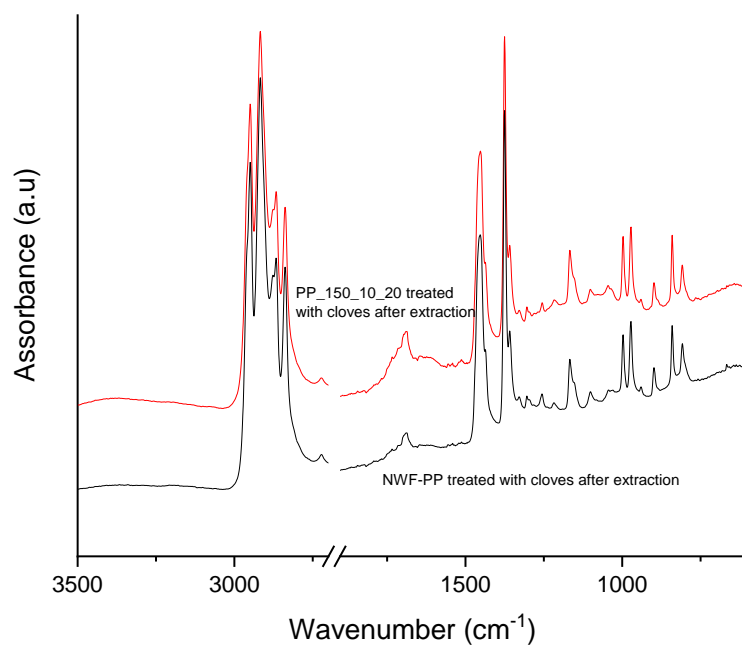

Figure S6: FTIR-ATR of samples NWF-PP\_cloves and PP\_150\_10\_20\_cloves both analysed after extraction
